# Supplementary material
Source: PubMed Central journal article supplement (PMC4168333)
Supplement: gf434sup_10-1055-s-0031-1298249.pdf [file gf434sup_10-1055-s-0031-1298249.pdf]

# Zertifizierte Brustkrebszentren aus Sicht der Zentrumsleitungen: Ergebnisse einer Schlüsselpersonenbefragung

## Key Informants' Perspectives on Accredited Breast Cancer Centres: Results of a Survey

### Autoren

C. Kowalski<sup>1</sup>, S. Wesselmann<sup>2</sup>, L. Ansmann<sup>1</sup>, R. Kreienberg<sup>3</sup>, H. Pfaff<sup>1</sup>

### Institute

<sup>1</sup> IMVR – Institut für Medizinsoziologie, Versorgungsforschung und Rehabilitationswissenschaft der Humanwissenschaftlichen Fakultät und der Medizinischen Fakultät der Universität zu Köln, Köln

<sup>2</sup> Deutsche Krebsgesellschaft e. V., Berlin

<sup>3</sup> Universitäts-Frauenklinik, Ulm

### Schlüsselwörter

- Schlüsselpersonenbefragung
- Brustkrebszentren
- Mammakarzinom

### Key words

- key informant survey
- breast cancer centers
- breast cancer

### Zusammenfassung

▼  
In dieser Arbeit sind die Ergebnisse der zwischen Juni und September 2011 in den nach den Kriterien der Deutschen Krebsgesellschaft e. V. (DKG) zertifizierten Brustkrebszentren durchgeführten Befragung von Schlüsselpersonen dargestellt. Ziel der Befragung war es, nach der Patientenperspektive (Kowalski et al. in diesem Heft) auch die versorgerseitige Akzeptanz des Brustkrebszentrenkonzepts zu untersuchen und einen vergleichenden Überblick über Strukturen und Prozesse der Brustkrebszentren in Deutschland zu gewinnen. Die schriftliche Befragung wurde in Anlehnung an die Total-Design-Methode nach Dillman mit 2 Erinnerungsschreiben durchgeführt. Zum Einsatz kam der Fragebogen für Schlüsselpersonen in Brustkrebszentren 2011 (*FRIZ 2011*). Aus jedem Zentrum wurde ein Ansprechpartner um Teilnahme gebeten. Aus 149 von insgesamt 243 Operationsstandorten gingen ausgefüllte und auswertbare Fragebogen ein. Dies entspricht einem Rücklauf von 61,3%. Die weit überwiegende Mehrheit der Personen, die den Fragebogen ausgefüllt haben, gab an, Teil der Brustzentumsleitung zu sein und regelmäßig an den Qualitätszirkeln mit den Hauptkooperationspartnern der Brustkrebszentren teilzunehmen. 110 der 149 teilnehmenden Operationsstandorte hatten zuvor bereits an der Befragung von Patientinnen mit primärem Mammakarzinom in den gleichen Zentren teilgenommen. Im Hinblick auf Verbesserungen der Versorgungsqualität genießt das Konzept unter den befragten Schlüsselpersonen eine hohe Zustimmung. Das Konzept wird insgesamt fast durchgehend als gut oder sehr gut bewertet. Sowohl der Kontakt zu den niedergelassenen Ärzten als auch das Ansehen der Häuser haben sich in der

Wahrnehmung der Befragten seit Einführung des Konzepts in der weit überwiegenderen Zahl der Häuser verbessert. In den Qualitätszirkeln mit den Hauptkooperationspartnern nehmen Themen zu Qualität und Patientensicherheit mehr Raum ein als finanzielle Themen.

### Abstract

▼  
This paper presents the results of a survey among key informants that was conducted between June and September 2011 in Breast Cancer Centers that were accredited according to the criteria of the German Cancer Society (DKG). The survey intended to assess the degree to which the breast cancer center concept was accepted among the key informants as well as to gain an overview over structures and processes in the centers. The Questionnaire for Breast Cancer Centres Key Informants 2011 (*FRIZ 2011*) was used with two reminders having been sent out. Questionnaires were sent back from 149 of the 243 initially contacted hospitals (response rate: 61.3%). The vast majority of respondents indicated to be part of the Breast Cancer Center management. 110 of the 149 hospitals did also participate in the patient survey conducted in 2010. Among the key informants surveyed, the concept is highly accepted with regard to improvements in patient care. Overall, the concept is regarded as "good" or "very good" by almost all respondents. Both contact to resident doctors and the hospitals' reputations improved since the implementation of the concept. Quality and patient safety were more often on the agenda than financial performance in the quality circles with the main co-operation partners of the Breast Cancer Centers.

eingereicht 5. 12. 2011

revidiert 5. 1. 2012

akzeptiert 19. 1. 2012

### Bibliografie

DOI <http://dx.doi.org/10.1055/s-0031-1298249>

Geburtsh Frauenheilk 2012; 72: 1–8 © Georg Thieme Verlag KG  
Stuttgart · New York ·  
ISSN 0016-5751

### Korrespondenzadresse

**Dr. Christoph Kowalski**

IMVR – Institut für Medizinsoziologie, Versorgungsforschung und Rehabilitationswissenschaft der Humanwissenschaftlichen Fakultät und der Medizinischen Fakultät der Universität zu Köln  
Eupener Straße 129  
50933 Köln  
[christoph.kowalski@uk-koeln.de](mailto:christoph.kowalski@uk-koeln.de)

## Einleitung

Im Rahmen des 3-Stufen-Modells der zertifizierten onkologischen Versorgungsstrukturen zertifiziert die Deutsche Krebsgesellschaft (DKG) seit 2003 Brustkrebszentren. In dieser Arbeit sind die Ergebnisse der im Jahr 2011 in den nach den Kriterien der Deutschen Krebsgesellschaft e.V. (DKG) und der Deutschen Gesellschaft für Senologie e.V. (DGS) zertifizierten Brustkrebszentren durchgeführten Befragung von Schlüsselpersonen dargestellt. Die Befragung wurde im Anschluss an die im Jahr 2010 durchgeführte Befragung von Patientinnen und Patienten\* mit primärem Mammakarzinom aus denselben Krankenhäusern durchgeführt [1]. Ziel der Schlüsselpersonenbefragung war es, nach der Patientenperspektive auch die versorgerseitige Akzeptanz des Brustkrebszentrenkonzepts zu untersuchen und einen vergleichenden Überblick über Strukturen und Prozesse der zertifizierten Brustkrebszentren in Deutschland zu gewinnen. Zusätzlich kann mit den Daten untersucht werden, ob Strukturen und Prozesse erkennbar mit verschiedenen (Patient-Reported-) Outcomes zusammenhängen. Zu diesem Zweck können die Ergebnisse dieser Befragung beispielsweise mit den Ergebnissen der Patientenbefragung aus dem Jahr 2010 verknüpft werden. Denkbar ist auch die Verknüpfung mit anderen Sekundärdaten zur Erklärung von Unterschieden zwischen den Krankenhäusern. Die Befragung wurde erstmalig in den von der DKG zertifizierten Zentren durchgeführt und vom Institut für Medizinsoziologie, Versorgungsforschung und Rehabilitationswissenschaft (IMVR) der Humanwissenschaftlichen Fakultät und der Medizinischen Fakultät der Universität zu Köln abgewickelt. Vergleichbare Schlüsselpersonenbefragungen wurden 2007 und 2010 bereits in den nach den Anforderungen des Landes Nordrhein-Westfalen zertifizierten Brustzentren durchgeführt. Dieser Beitrag beschreibt die Durchführung der Befragung und stellt ausgewählte Ergebnisse vor. Abschließend werden die Ergebnisse kritisch diskutiert.

## Material und Methodik

In die Befragung eingeschlossen wurden alle operativen Standorte der von der Deutschen Krebsgesellschaft e.V. (DKG) zertifizierten Brustkrebszentren, sofern sie nicht auch zusätzlich nach den Kriterien des Landes Nordrhein-Westfalen (NRW) zertifiziert waren und so bereits 2010 Teil einer vom IMVR durchgeführten Schlüsselpersonenbefragung waren. Im Juni 2011 wurde je ein Ansprechpartner in leitender Position innerhalb der Operationsstandorte angeschrieben. Die insgesamt 243 Ansprechpartner der Krankenhäuser aus 198 zertifizierten Brustkrebszentren wurden gebeten, den Fragebogen zur Schlüsselpersonenbefragung auszufüllen oder an eine andere auskunftsfähige Person weiterzugeben. Als Ansprechpartner fungierten diejenigen Mitarbeiter der zertifizierten Brustkrebszentren, die bereits für die zuvor durchgeführte Patientenbefragung als Kontaktpersonen dienten, also in aller Regel die Leiter oder Zentrumskoordinatoren bzw. von ihnen benannte Stellvertreter. Weitere Ein- und Ausschlusskriterien wurden nicht definiert. Die Teilnahme der zertifizierten Brustkrebszentren an der Befragung war freiwillig.

Die schriftliche Befragung wurde in Anlehnung an die Total-Design-Methode nach Dillman durchgeführt [2]. Diese Methode sieht das mehrfache Anschreiben und Erinnern der Befragten vor, um eine möglichst hohe Ausschöpfungsquote zu erzielen [3,4]. Zusammen mit dem Fragebogen erhielten die zu Befragenden einen portofreien Rückumschlag sowie ein Anschreiben, das u.a. das Ziel der Befragung erläuterte und Hinweise zum Datenschutz enthielt. Drei Wochen nach Zusendung des Fragebogens wurde ein 1. Erinnerungsschreiben verschickt. Drei Wochen nach diesem Schreiben wurde eine 2. Erinnerung mit einem beigelegten Fragebogen und Rückumschlag verschickt. Der Befragungszeitraum erstreckte sich von Mitte Juni bis Ende September 2011. Das Ende des Befragungszeitraums wurde auf den 30. September 2011 festgelegt. Nach diesem Datum eingehende Fragebogen konnten nicht mehr berücksichtigt werden.

Diese in der Literatur als „Key-Informant-“ oder „Schlüsselpersonenbefragung“ bezeichnete Methode ist ein häufig angewandtes Verfahren und nutzt das Wissen von Mitarbeitern, die in der Regel über Entscheidungsbefugnisse verfügen. Die Vorzüge dieser Methode sind beispielsweise bei Rousseau zusammengefasst [5]. So verfügen leitende Personen oft über sehr gute Kenntnisse zu Strukturen und Prozessen einer Organisation (siehe auch [6]). Ein Vorteil gegenüber weitaus aufwendigeren Mitarbeiterbefragungen ist, dass mittels Schlüsselpersonenbefragungen bei geringeren Kosten eine größere Anzahl an Krankenhäusern befragt werden kann. Dabei soll nicht unerwähnt bleiben, dass die Angaben einzelner Schlüsselpersonen unter Umständen von denen anderer Organisationsmitglieder abweichen können oder Verzerrungen durch die Subjektivität der Antworten ausgesetzt sind [7]. Es muss einschränkend darauf hingewiesen werden, dass die Auskünfte auch zu vermeintlich „harten“ Faktenfragen, beispielsweise nach der Zahl der Operationen pro Jahr oder der Zahl der in klinische Studien eingeschlossenen Patienten, nicht notwendigerweise den wahren Wert wiedergeben.

## Erhebungsinstrument

Der Fragebogen für Schlüsselpersonen in Brustkrebszentren 2011 (FRIZ 2011) wurde in Zusammenarbeit mit der DKG auf die besondere Situation der DKG-zertifizierten Brustkrebszentren zugeschnitten. Ein Teil der Fragen kam bereits in der 2010 in Nordrhein-Westfalen vom IMVR in den von der Ärztekammer Westfalen-Lippe zertifizierten Brustzentren durchgeführten Befragung zum Einsatz. Andere wurden für diese Befragung neu entwickelt oder sind bereits in vergleichbaren Befragungen in den USA im Einsatz. Das eingesetzte Instrument bestand aus 11 Themengebieten mit insgesamt 73 Fragen. In Anlehnung an die an Brustkrebszentren gestellten Anforderungen zur (Re-)Zertifizierung und aufgrund bereits etablierter Kennzahlen und Skalen, u.a. zur Erfassung der Zusammenarbeit, war es möglich, auch bereits erprobte Fragen und Items einzusetzen. Das Erhebungsinstrument bestand überwiegend aus Faktenfragen zu Strukturen und Prozessen im Brustkrebszentrum, beinhaltete aber auch einen Abschnitt zur Bewertung des Brustkrebszentrenkonzepts.

## Dateneingabe und -aufbereitung

Die eingehenden Fragebogen wurden fortlaufend mittels des Programms Teleform® eingelesen. Das Programm umfasst eine Fehleranalyse, in der Eingabefehler und undeutliche Angaben identifiziert werden. Im Zweifelsfall wurde die Möglichkeit genutzt, die Daten mit den Originalfragebogen abzugleichen, um Fehler zu korrigieren. Die in den nachfolgenden Tabellen dargestellten Ergebnisse wurden mithilfe des Statistikprogramms IBM SPSS®

\* Im Folgenden wird der einfacheren Lesbarkeit stets die männliche Form verwendet, wenn von Patientinnen und Patienten, Mitarbeiterinnen und Mitarbeitern, Ärztinnen und Ärzten die Rede ist.

Version 19.0 berechnet. Es werden jeweils die gültigen Prozente (ohne Berücksichtigung fehlender Fälle) berichtet, sofern nicht anders angegeben. Aufgrund des automatischen Auf- und Abrundens kann es vorkommen, dass die Summe einzelner Prozentangaben in den Tabellen nicht exakt 100 ergibt.

## Ergebnisse

Nachfolgend werden ausgewählte Ergebnisse der Schlüsselpersonenbefragung in den von der DKG zertifizierten Brustkrebszentren in 2011 berichtet. Der vollständige Ergebnisbericht ist auf den Webseiten von DKG und IMVR einzusehen. Die Darstellung der Ergebnisse beginnt mit einem Überblick über den erzielten Rücklauf. Im Anschluss werden die Ergebnisse zu den Fragen des *FRIZ 2011* entweder in Form von Tabellen oder Stabdiagrammen dargestellt. Der Anteil der pro Frage fehlenden Antworten ist jeweils angegeben.

### Rücklauf und Stichprobenbeschreibung

Aus 149 von insgesamt 243 Operationsstandorten gingen ausgefüllte und auswertbare Fragebogen ein. Dies entspricht einem Rücklauf von 61,3%. Aus 4 Operationsstandorten ging aufgrund von Überschneidungen von Rücklauf und Versand des Erinnerungsschreibens zudem ein 2. Fragebogen ein. Diese Fragebogen wurden nicht berücksichtigt. Nach Ende des zuvor festgesetzten Befragungszeitraums gingen 4 weitere Fragebogen ein, die für die nachfolgenden Auswertungen nicht mehr berücksichtigt werden konnten. Die weit überwiegende Mehrheit der Personen, die den

Fragebogen ausgefüllt haben, gab an, Teil der Brustzentrumsleitung zu sein (86,2%) und regelmäßig an den Qualitätszirkeln mit den Hauptkooperationspartnern der zertifizierten Brustkrebszentren teilzunehmen (97,9%). Die Mehrheit der an der Befragung teilnehmenden Krankenhäuser unterliegt einer öffentlichen Trägerschaft (53,8%).

110 der 149 teilnehmenden Operationsstandorte hatten zuvor an der bereits erwähnten Befragung von Patienten mit primärem Mammakarzinom teilgenommen. Unter den Krankenhäusern, die an der Patientenbefragung teilgenommen hatten, war die Teilnahmequote an der Schlüsselpersonenbefragung deutlich höher (69%) als unter den Krankenhäusern, die nicht an der Befragung teilgenommen hatten (46%). Grundlage für die weiteren Ergebnisse sind die Angaben von den 149 an der Schlüsselpersonenbefragung teilnehmenden Krankenhäusern.

In **Tab. 1** sind Lage- und Streumaße ausgewählter Krankenhausmerkmale dargestellt (Mittelwerte, Minimum, Maximum, Standardabweichung, Median). Deutlich werden die Unterschiede der Häuser bezüglich Zahl der operierenden Ärzte und der Zahl der onkologischen Pflegefachkräfte. Auch der Abstand zwischen Diagnoseerstellung und Operation variiert deutlich, während der Mittelwert der durchschnittlichen Verweildauer bei 5 Tagen mit nur einer kleinen Standardabweichung liegt.

In **Tab. 2** ist die Umsetzung ausgewählter Struktur- und Prozessmerkmale dargestellt. Alle ausgewählten Aspekte werden von der Mehrheit der OP-Standorte umgesetzt. Die Anforderungen zur Zertifizierung (z.B. Primärtumordokumentation, Follow-Up-Tumordokumentation) werden dabei von annähernd allen Häusern erfüllt.

**Tab. 1** Ausgewählte Krankenhausmerkmale: Mittelwerte, Minimum, Maximum, Standardabweichung, Median.

|                                                                                                                                                 | Mittelwert | Minimum | Maximum | Standardabweichung | Median | keine Angabe |
|-------------------------------------------------------------------------------------------------------------------------------------------------|------------|---------|---------|--------------------|--------|--------------|
| Wie viele Ärzte (Hauptoperateure) operieren in Ihrem OP-Standort Patientinnen mit primärem Mammakarzinom?                                       | 3,2        | 1       | 16      | 1,7                | 3      | 1            |
| Wie viele ausgebildete onkologische Fachpflegekräfte sind in Ihrem OP-Standort tätig?                                                           | 2,3        | 0       | 20      | 2,1                | 2      | 4            |
| Wie lang ist im Durchschnitt der Abstand zwischen Diagnosestellung des primären Mammakarzinoms in Ihrem OP-Standort und der Operation in Tagen? | 8,8        | 0       | 25      | 4,2                | 8      | 3            |
| Wie lang ist im Durchschnitt die Verweildauer der Patientinnen mit primärem Mammakarzinom in Ihrem OP-Standort?                                 | 5,3        | 3       | 10      | 1,3                | 5      | 3            |

**Tab. 2** Umsetzung ausgewählter Struktur- und Prozessmerkmale.

| Inwieweit treffen die folgenden Aussagen zu?<br>In unserem Brustkrebszentrum (mit allen OP-Standorten) ... | nein | nein, aber in Arbeit/<br>geplant | ja   | keine<br>Angabe |
|------------------------------------------------------------------------------------------------------------|------|----------------------------------|------|-----------------|
| ... gibt es ein schriftliches Konzept zur Durchführung der Tumorkonferenz.                                 | 4,1  | 0,7                              | 95,3 | 1               |
| ... gibt es eine schriftliche Verfahrensanweisung über die Einbindung von Selbsthilfegruppen.              | 20,8 | 7,4                              | 71,8 | 0               |
| ... gibt es einen definierten Patientinnenpfad, der für alle Patientinnen mit primärem Mammakarzinom gilt. | 2,7  | 5,4                              | 91,9 | 0               |
| ... gibt es unabhängig von der Tumorkonferenz feste gemeinsame wöchentliche Termine (z. B. Jour fixe).     | 36,9 | 3,4                              | 59,7 | 0               |
| ... haben wir festgelegte Ziele.                                                                           | 1,3  | 1,3                              | 97,3 | 0               |
| ... haben wir ein gemeinsames Qualitätsmanagement.                                                         | 3,4  | 0                                | 96,6 | 0               |
| ... ist die Vision des Brustkrebszentrums in einem Leitbild verankert.                                     | 8,1  | 3,4                              | 88,6 | 0               |
| ... haben wir ein Corporate Design (z. B. Logo).                                                           | 7,4  | 4,7                              | 87,9 | 0               |
| ... findet eine Primärtumordokumentation statt.                                                            | 0,7  | 1,3                              | 98,0 | 0               |
| ... findet eine Follow-Up-Tumordokumentation statt.                                                        | 0,7  | 2,0                              | 97,3 | 0               |

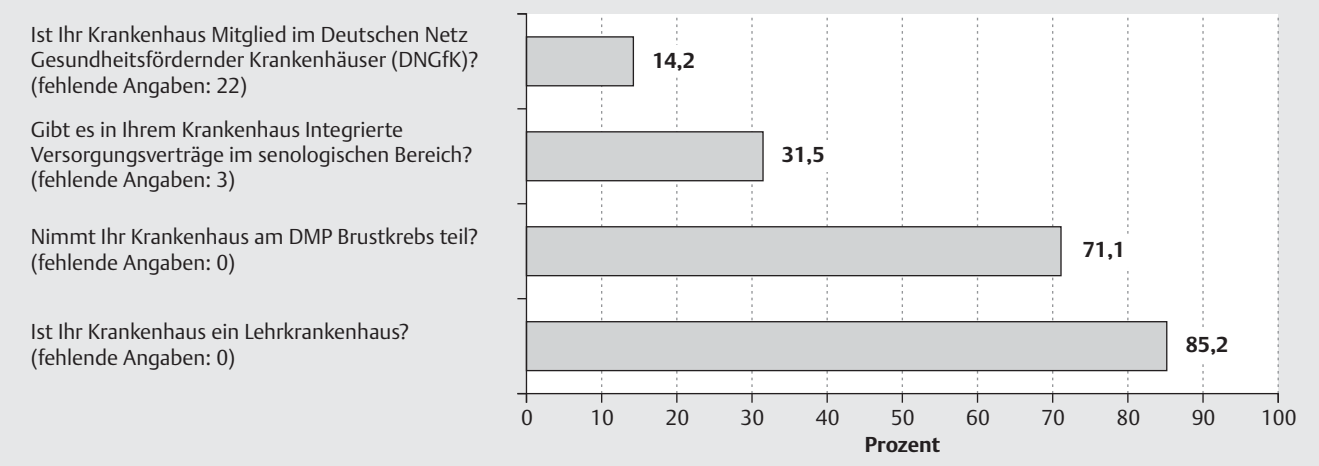

Abb. 1 DNGfK, Integrierte Versorgungsverträge, DMP Brustkrebs und Lehrkrankenhaus.

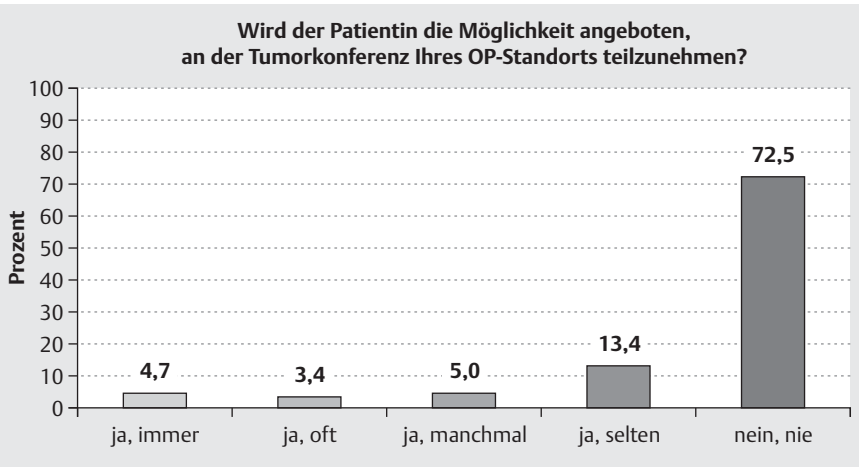

Abb. 2 Möglichkeit zur Teilnahme an Tumorkonferenzen in gültigen Prozent (fehlende Angaben: 0).

Onkologische Fachpflegekräfte sind in 22,5% der Häuser vollständig und in weiteren 41,5% teilweise von übrigen pflegerischen Aufgaben entbunden (ohne Abbildung). Die meisten der teilnehmenden Krankenhäuser sind Lehrkrankenhäuser (● Abb. 1). 71% der Krankenhäuser nehmen am DMP Brustkrebs teil, während knapp ein Drittel an Integrierten Versorgungsverträgen beteiligt ist. 14% der Krankenhäuser sind Mitglieder im Netz Gesundheitsfördernder Krankenhäuser. Zu beachten ist der relativ hohe Anteil fehlender Angaben bei dieser Frage (n = 22).

**Einbeziehung und Information der Patienten**  
 ● Abb. 2 ist zu entnehmen, ob den Patienten in den OP-Standorten das Angebot gemacht wird, an den Tumorkonferenzen teil-

zunehmen. In knapp 5% der Häuser ist dies immer der Fall, in 72,5% nie. Alle OP-Standorte stellen ihren Patienten Informationen über das Brustkrebszentrum zur Verfügung (● Tab. 3). In jeweils mehr als drei Viertel der Häuser kommen Informationsmappen, Flyer und Informationen auf der Webseite zum Einsatz. Informationsmaterialien für Patienten werden in einigen Häusern auch in anderen Sprachen als Deutsch zur Verfügung gestellt, darunter am häufigsten Türkisch (29,5% der Häuser) und Englisch (25,5%) (● Abb. 3).

**Kooperation mit den einweisenden Ärzten**  
 In fast allen OP-Standorten erfolgt der Kontakt mit niedergelassenen Ärzten über Informationsveranstaltungen und Fortbildun-

Tab. 3 Patienteninformationen.

| In welcher Form werden Informationen über das Brustkrebszentrum an die Patientinnen weitergegeben? (Mehrfachnennungen möglich) | nein | ja   | keine Angabe |
|--------------------------------------------------------------------------------------------------------------------------------|------|------|--------------|
| Informationsmappe                                                                                                              | 16,1 | 83,9 | 0            |
| Informationsveranstaltung                                                                                                      | 34,2 | 65,8 | 0            |
| Homepage                                                                                                                       | 22,1 | 77,9 | 0            |
| Flyer                                                                                                                          | 19,5 | 80,5 | 0            |
| gar nicht                                                                                                                      | 100  | 0    | 0            |

**In welcher Sprache stehen in Ihrem OP-Standort Informationsmaterialien für Patientinnen mit Brustkrebs zur Verfügung?**

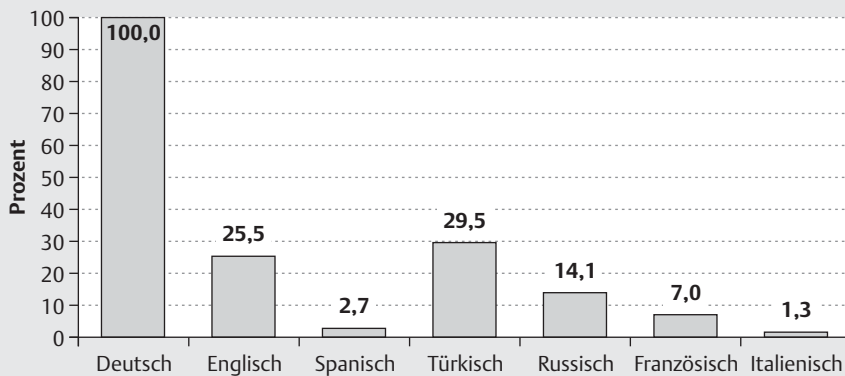

**Abb. 3** Angebot verschiedensprachiger Informationsmaterialien in gültigen Prozenten (fehlende Angaben: 0).

gen (● Tab. 4). Zusätzlich gibt es in je ca. 40% der OP-Standorte regelmäßige bzw. unregelmäßige Arbeitstreffen mit einweisenden Ärzten. In fast allen OP-Standorten erhalten die einweisenden Ärzte Kopien der Befunde/Entlassungsberichte der Patienten mit Brustkrebs und in knapp drei Viertel der OP-Standorte wird der OP-Bericht dem einweisenden Arzt regelmäßig zugestellt. In 72,5% der OP-Standorte werden die Befunde, die Therapie und die Nachsorge der Patienten mit den einweisenden Ärzten persönlich besprochen.

#### Qualitätszirkel mit den Hauptkooperationspartnern

Die in den ● Tab. 5 bis 7 dargestellten Fragen sind dem *Governance, Leadership, and Clinical Care Survey* [8] entlehnt und auf die Situation in den DKG-zertifizierten Brustkrebszentren mit Qualitätszirkeln mit den Hauptkooperationspartnern angepasst worden. In den Qualitätszirkeln mit den Hauptkooperationspartnern steht die qualitative Leistung deutlich häufiger auf der Tagesordnung als die finanzielle Leistung (● Tab. 5).

Auch bezüglich der im Jahresverlauf veranschlagten Zeit in den Qualitätszirkeln mit den Hauptkooperationspartnern dominieren Aspekte der Qualität und Patientensicherheit diejenigen der Finanzen (● Tab. 6).

Mindestens 1-mal im Jahr werden in je über 95% der Häuser die Ergebnisse des Kennzahlenbogens und die Patientenzufriedenheit überprüft. Medikationsfehler und im Krankenhaus erworbene Infektionen werden hingegen bei 35 bzw. 24% der OP-Standorte weniger als 1-mal im Jahr durch den Qualitätszirkel mit den Hauptkooperationspartnern überprüft (● Tab. 7).

#### Beurteilung des Brustkrebszentrenkonzepts und Veränderungen seit dessen Einführung

Über 90% der Befragten beurteilen das Brustzentrenkonzept als „gut“ oder „sehr gut“, keiner als „schlecht“ (● Abb. 4). Die Mehrheit der Befragten sieht Verbesserungen in der Versorgungsqualität von Brustkrebspatienten sowohl im eigenen Brustkrebszentrum als auch allgemein in Deutschland (● Tab. 8), keiner beobachtet eine Verschlechterung. Auch hinsichtlich des Ansehens

**Tab. 4** Zusammenarbeit mit niedergelassenen Ärzten.

|                                                                                                                        | ja, regelmäßig | ja, unregelmäßig | nein | keine Angabe |
|------------------------------------------------------------------------------------------------------------------------|----------------|------------------|------|--------------|
| Gibt es in Ihrem Brustkrebszentrum Informationsveranstaltungen für Ihre einweisenden Ärzte?                            | 81,9           | 16,8             | 1,3  | 0            |
| Gibt es in Ihrem Brustkrebszentrum Treffen zur Fortbildung für Ihre einweisenden Ärzte?                                | 81,9           | 17,4             | 0,7  | 0            |
| Gibt es in Ihrem Brustkrebszentrum Arbeitstreffen mit Ihren einweisenden Ärzten, z. B. um Probleme zu besprechen?      | 38,9           | 40,9             | 20,1 | 0            |
| Erhalten die einweisenden Ärzte Kopien der Befunde/Entlassungsberichte der Patientinnen mit Brustkrebs?                | 98,7           | 0                | 1,3  | 0            |
| Werden die Befunde, die Therapie und die Nachsorge der Patientinnen mit den einweisenden Ärzten persönlich besprochen? | 12,1           | 60,4             | 27,5 | 0            |
| Wird der OP-Bericht dem einweisenden Arzt zugestellt?                                                                  | 72,3           | 11,5             | 16,2 | 1            |

**Tab. 5** Themen im Qualitätszirkel mit den Hauptkooperationspartnern (gültige Prozente).

| Wie häufig ...                                                                                                  | bei jeder Sitzung | bei den meisten Sitzungen | bei einigen Sitzungen | bei nur wenigen Sitzungen | niemals | keine Angabe |
|-----------------------------------------------------------------------------------------------------------------|-------------------|---------------------------|-----------------------|---------------------------|---------|--------------|
| ... stehen finanzielle Themen auf der Tagesordnung des Qualitätszirkels mit den Hauptkooperationspartnern?      | 0                 | 6,8                       | 23,6                  | 56,8                      | 12,8    | 1            |
| ... steht die qualitative Leistung auf der Tagesordnung des Qualitätszirkels mit den Hauptkooperationspartnern? | 39,6              | 44,3                      | 14,1                  | 2,0                       | 0       | 0            |

**Tab. 6** Themen im Qualitätszirkel mit den Hauptkooperationspartnern II (gültige Prozente).

|                                                                                                                                                                                              | 10% oder weniger | 11–20% | 21–30% | 31–40% | mehr als 40% | keine Angabe |
|----------------------------------------------------------------------------------------------------------------------------------------------------------------------------------------------|------------------|--------|--------|--------|--------------|--------------|
| Wie viel Prozent der Zeit wird im Jahresverlauf bei Sitzungen des Qualitätszirkels mit den Hauptkooperationspartnern für finanzielle Themen üblicherweise verwendet?                         | 78,8             | 14,4   | 4,1    | 2,7    | 0            | 3            |
| Wie viel Prozent der Zeit wird im Jahresverlauf bei Sitzungen des Qualitätszirkels mit den Hauptkooperationspartnern für das Thema Qualität und Patientensicherheit üblicherweise verwendet? | 2,7              | 14,2   | 26,4   | 14,2   | 42,6         | 1            |

**Tab. 7** Themen im Qualitätszirkel mit den Hauptkooperationspartnern III (gültige Prozente).

| Wie häufig werden die folgenden Aspekte durch den Qualitätszirkel mit den Hauptkooperationspartnern überprüft? | vierteljährlich oder häufiger | mindestens 1-mal im Jahr | weniger als 1-mal im Jahr oder nie | keine Angabe |
|----------------------------------------------------------------------------------------------------------------|-------------------------------|--------------------------|------------------------------------|--------------|
| im Krankenhaus erworbene Infektionen                                                                           | 17,6                          | 58,1                     | 24,3                               | 1            |
| Medikationsfehler                                                                                              | 15,5                          | 49,3                     | 35,1                               | 1            |
| Ergebnisse des Kennzahlenbogens                                                                                | 14,1                          | 83,9                     | 2,0                                | 1            |
| Qualitätsindikatoren der BQS/AQUA                                                                              | 13,4                          | 75,2                     | 11,4                               | 0            |
| Patientenzufriedenheit                                                                                         | 20,8                          | 75,8                     | 3,4                                | 0            |

**Tab. 8** Beurteilung von Entwicklungen seit Einführung der Brustkrebszentren.

|                                                                                                                                                                        | sehr verbessert | etwas verbessert | unverändert | etwas verschlechtert | sehr verschlechtert | keine Angabe |
|------------------------------------------------------------------------------------------------------------------------------------------------------------------------|-----------------|------------------|-------------|----------------------|---------------------|--------------|
| Wie hat sich die Versorgungsqualität der Patientinnen mit primärem Mammakarzinom in Ihrem Brustkrebszentrum seit Einführung der Brustkrebszentren insgesamt verändert? | 44,9            | 44,9             | 10,2        | 0                    | 0                   | 2            |
| Wie hat sich die Versorgungsqualität der Patientinnen mit primärem Mammakarzinom seit Einführung der Brustkrebszentren in Deutschland insgesamt verändert?             | 45,6            | 50,3             | 4,1         | 0                    | 0                   | 2            |
| Wie hat sich die wirtschaftliche Situation Ihres OP-Standorts seit Einführung der Brustkrebszentren verändert?                                                         | 5,6             | 18,8             | 46,5        | 24,3                 | 4,9                 | 5            |
| Wie hat sich das Ansehen Ihres OP-Standorts seit Einführung der Brustkrebszentren verändert?                                                                           | 33,8            | 45,3             | 20,9        | 0                    | 0                   | 1            |
| Wie hat sich der Kontakt Ihres OP-Standorts zu niedergelassenen Ärzten seit Einführung der Brustkrebszentren verändert?                                                | 9,5             | 49,7             | 40,8        | 0                    | 0                   | 2            |
| Wie hat sich die Kommunikation Ihres OP-Standorts mit der Krankenhausleitung seit Einführung der Brustkrebszentren verändert?                                          | 6,9             | 39,3             | 49,7        | 3,4                  | 0,7                 | 4            |
| Wie hat sich das Betriebsklima in Ihrem OP-Standort seit Einführung der Brustkrebszentren verändert?                                                                   | 5,5             | 32,2             | 56,2        | 5,5                  | 0,7                 | 3            |
| Wie hat sich die Qualität der psychoonkologischen Betreuung Ihres OP-Standorts seit Einführung der Brustkrebszentren verändert?                                        | 61,5            | 31,8             | 6,8         | 0                    | 0                   | 1            |
| Wie hat sich die Qualität der Tumorkonferenzen Ihres OP-Standorts seit Einführung der Brustkrebszentren verändert?                                                     | 55,1            | 32,0             | 12,2        | 0,7                  | 0                   | 2            |

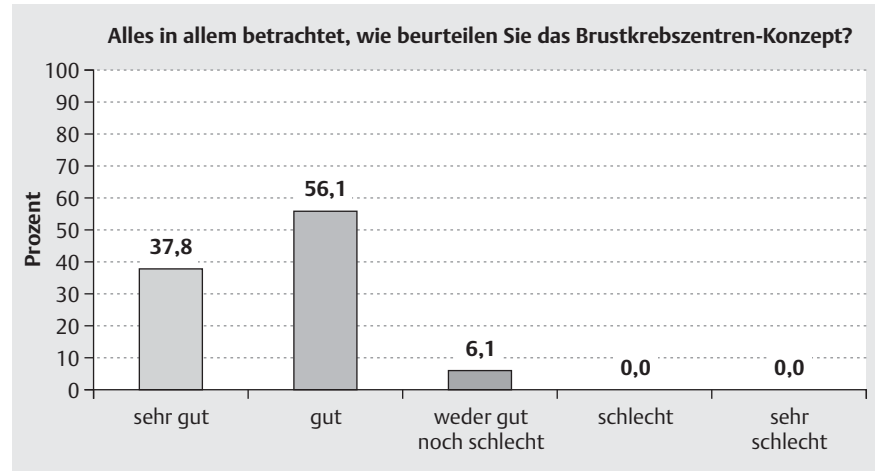

**Abb. 4** Beurteilung Brustkrebszentren-Konzept (gültige Prozente).

des Zentrums, der psychoonkologischen Betreuung und der Qualität der Tumorkonferenz werden von der weit überwiegenden Mehrheit Verbesserungen wahrgenommen. Weniger deutlich werden die Verbesserungen hinsichtlich des Betriebsklimas, der Kommunikation mit den niedergelassenen Ärzten und der Krankenhausleitung bewertet. Knapp 30% der Befragten berichteten für ihre OP-Standorte eine Verschlechterung der wirtschaftlichen Situation seit Einführung der Brustkrebszentren.

## Diskussion

Ziel dieser Befragung war es, die Akzeptanz des Konzepts der zertifizierten Brustkrebszentren aus Sicht der Schlüsselpersonen eines Zentrums zu untersuchen und die Auswirkungen der Zertifizierung auf den klinischen Alltag zu überprüfen. Insofern stellt diese Arbeit einen Beitrag zur in ihrer Bedeutung noch steigenden Versorgungsforschung dar [9].

Was macht das Konzept der zertifizierten Brustkrebszentren aus? Ziel des Zertifizierungssystems ist die Verbesserung der Behandlung und Betreuung der Patientinnen mit Brustkrebs. Grundlage dafür ist die Kooperation aller relevanten Fachdisziplinen, Berufsgruppen und Patientenvertreter, also eine interdisziplinäre, multiprofessionelle und sektorenübergreifende Zusammenarbeit aller Beteiligten. Nur auf diesem Weg kann eine qualitätsgesicherte und umfassende Betreuung der Patientinnen erreicht werden. Mit der Zertifizierung wird die Umsetzung dieser Voraussetzungen in den klinischen Alltag eingefordert und überprüft.

Die Ergebnisse der Befragung zeigen, dass das beschriebene Konzept der zertifizierten Brustkrebszentren von annähernd allen Teilnehmern der Befragung (93,9%) als gut bis sehr gut eingeschätzt wird. Bei der genauen Analyse der Gründe, die zu dieser Einschätzung führen, fällt vor allem die aus Sicht der Schlüsselpersonen verbesserte Versorgungsqualität der Patientinnen seit Einführung der Brustkrebszentren auf, sowohl im eigenen Brustkrebszentrum (89,8%) als auch in Deutschland insgesamt (95,9%). Darüber hinaus sieht über zwei Drittel der Befragten das Ansehen ihrer Klinik durch die Zertifizierung und der damit verbundenen Qualitätsdarstellung nach außen, beispielsweise über die Logoverwendung, verbessert. Weitere Aspekte der Zusammenarbeit in einem zertifizierten Netzwerk, wie der Kontakt zu den niedergelassenen Ärzten, haben sich aus Sicht der befragten Schlüsselpersonen ebenfalls verbessert (60%).

Ein zentraler Baustein in dem Konzept der Zertifizierung ist die interdisziplinäre Zusammenarbeit der Hauptbehandlungspartner im Rahmen der Tumorkonferenzen. Umso erfreulicher ist es, dass die Leistungserbringer die Qualität der Tumorkonferenz seit der Zertifizierung überwiegend als sehr verbessert (55,1%) bzw. als verbessert (32,0%) beurteilen. Auch die Qualität der psychoonkologischen Betreuung als wichtiges Zeichen einer umfassenden Betreuung der Patientin sowohl im Sinne des Zertifizierungskonzepts, aber vor allem auch im Sinne eines qualitativ hochwertigen onkologischen Betreuungskonzepts hat sich mit der Zertifizierung deutlich gesteigert.

Überraschenderweise ist das Betriebsklima in den meisten Zentren unverändert (56,2%) und bei deutlich über einem Drittel der Befragten sogar etwas bzw. sehr verbessert. Das bedeutet, dass die Anstrengungen, die im Rahmen des Zertifizierungsprozesses unternommen werden, keine negativen Auswirkungen auf die Zusammenarbeit der Behandlungspartner haben. Im Gegenteil, die eindeutig definierten Behandlungsprozesse und

Verantwortlichkeiten scheinen die Qualität der Zusammenarbeit zu unterstützen.

Bei den Befragungsergebnissen, die die Umsetzung des Konzepts der zertifizierten Brustkrebszentren widerspiegeln, fallen vor allem die Abläufe und Inhalte der Qualitätszirkel auf, zumal davon ausgegangen werden kann, dass in den Qualitätszirkeln auch Aspekte der Leitlinienreue diskutiert werden [9]. Insgesamt nehmen in den Qualitätszirkeln der Hauptkooperationspartner Themen zu Qualität und Patientensicherheit erfreulicherweise mehr Raum ein als finanzielle Themen. Dabei muss jedoch diskutiert werden, dass in mehr als einem Drittel der Häuser nie oder weniger als 1-mal im Jahr Medikationsfehler in den Qualitätszirkeln besprochen werden. Auch wenn Medikationsfehler u.U. in manchen Häusern an anderer Stelle analysiert werden, bietet sich hier doch erhebliches Potenzial für das Risikomanagement und die Patientensicherheit in den zertifizierten Brustkrebszentren.

Sehr positiv fällt dagegen auf, dass in annähernd allen Zentren mindestens 1-mal pro Jahr, teilweise auch vierteljährlich, die Ergebnisse des Kennzahlenbogens und die Ergebnisse der Patientenzufriedenheit diskutiert werden. Als Kennzahlen in dem Kennzahlenbogen zusammengefasst sind die Empfehlungen der evidenzbasierten Leitlinie, die Anforderungen an die interdisziplinäre Zusammenarbeit, aber auch die Anforderungen an die persönliche Expertise der Leistungserbringer. Das bedeutet, die Hauptbehandlungspartner in einem Zentrum diskutieren ihre konkreten Ergebnisse interdisziplinär, können Stärken und Schwächen ihres Zentrums identifizieren und so gezielte Maßnahmen für eine Qualitätsverbesserung umsetzen. Gleiches gilt für die Patientenzufriedenheit. Dass die Zentren die Rückmeldungen der Patientinnen für ihre interdisziplinäre Diskussion in den Qualitätszirkeln nutzen und daraus gegebenenfalls Verbesserungspotenzial oder auch positive Bestätigung ableiten können, ist eine sehr überzeugende Umsetzung des Konzepts der zertifizierten Brustkrebszentren in den klinischen Alltag.

Aus den Auswertungen der Befragung wird sehr gut deutlich, wie groß die von den zertifizierten Brustkrebszentren gezeigte freiwillige Initiative ist, mit der das Konzept der Zertifizierung umgesetzt wird, um für die Patientinnen eine immer bessere Versorgungsqualität sowohl aus Sicht der Leistungserbringer als auch aus Sicht der Patientinnen [1] zu erreichen. Diese Anstrengungen bilden sich sehr heterogen in der Entwicklung der wirtschaftlichen Situation seit Einführung des Brustkrebszentrenkonzepts ab. Während etwa ein Drittel der Häuser eine leichte Verschlechterung der wirtschaftlichen Situation wahrnimmt, hat sie sich für ein Viertel der zertifizierten Zentren verbessert. Der Zusammenhang zwischen einer für das Gesundheitswesen verbesserten Kosteneffektivität und einer teilweisen Verschlechterung der wirtschaftlichen Situation bei einzelnen Leistungserbringern im Zuge von Zertifizierungen ist an anderer Stelle bereits thematisiert worden [10,11]. Um hier einen genaueren Überblick über die finanziellen Auswirkungen zu erlangen, ist vonseiten der Deutschen Krebsgesellschaft eine Befragung der zertifizierten Zentren geplant.

Ein weiterer wichtiger Punkt der Befragungsergebnisse ist die mittlere Verweildauer der Patienten, die bei einem Minimum von 3 und einem Maximum von 10 Tagen im Mittel mit 5,3 Tagen angegeben wurde. Um die vielfältigen Bedürfnisse der Patienten hinsichtlich umfassender Information und Vorbereitung auf die Zeit nach der Entlassung aus dem Krankenhaus [1] möglichst gut zu befriedigen, sollte die derzeit diskutierte weitere Reduk-

tion der Liegezeit oder gar eine konsequente Verlagerung in den ambulanten Bereich vermieden werden.

## Fazit

Ziel dieser Befragung war es, die Akzeptanz des Konzepts der zertifizierten Brustkrebszentren aus Sicht der Schlüsselpersonen eines Zentrums zu untersuchen und die Auswirkungen der Zertifizierung auf den klinischen Alltag zu überprüfen.

Aus den Auswertungen wird ersichtlich, dass das beschriebene Konzept der zertifizierten Brustkrebszentren von annähernd allen Teilnehmern der Befragung als gut bis sehr gut eingeschätzt wird. Entscheidend trägt dazu aus Sicht der Leistungserbringer die verbesserte Versorgungsqualität der Patientinnen seit Einführung der Brustkrebszentren bei. Darüber hinaus sieht über zwei Drittel der Befragten das Ansehen ihrer Klinik und den Kontakt zu den niedergelassenen Ärzten durch die Zertifizierung verbessert. Die Qualität der Tumorkonferenz und die Qualität der psychoonkologischen Betreuung werden ganz überwiegend als deutlich verbessert beurteilt.

In den Qualitätszirkeln der Hauptkooperationspartner nehmen die Themen zu Qualität und Patientensicherheit erfreulicherweise mehr Raum ein als finanzielle Themen. Während in mehr als einem Drittel der Häuser nie oder weniger als 1-mal im Jahr Medikationsfehler in den Qualitätszirkeln besprochen werden, werden in annähernd allen Zentren mindestens 1-mal pro Jahr, teilweise auch vierteljährlich, die Ergebnisse des Kennzahlenbogens und die Ergebnisse der Patientenzufriedenheit diskutiert, um gezielte Qualitätsverbesserungen umzusetzen.

Die Auswirkungen der Zertifizierung auf die wirtschaftliche Situation stellen sich heterogen dar. Für eine genaue Analyse wird vonseiten der Deutschen Krebsgesellschaft eine Befragung der zertifizierten Zentren zu den Hintergründen der Finanzierung durchgeführt werden.

Zusammenfassend zeigen die Ergebnisse eine große Akzeptanz des Konzepts der zertifizierten Brustkrebszentren, das mit dem großen Einsatz der Leistungserbringer umgesetzt wird, um die Qualität der Versorgung der Patientinnen weiter zu verbessern.

## Interessenkonflikt

Nein.

## Literatur

- 1 Kowalski C, Wesselmann S, Kreienberg R et al. The patients' view on accredited breast cancer centers: strengths and potential for improvement. *Geburtsh Frauenheilk* 2012; in print
- 2 Dillman DA. Mail and Telephone Survey: the total Design Method. New York: Wiley & Sons; 1978
- 3 Freise DC. Methodische Aspekte der Durchführung von Patientenbefragungen. In: Pfaff H, Freise DC, Mager G, Schrappe M, Hrsg. Der Kölner Patientenfragebogen (KPF). Köln: Forschungsbericht der Universität zu Köln; 2003; 29–50
- 4 Petermann S. Rücklauf und systematische Verzerrungen bei postalischen Befragungen. *ZUMA-Nachrichten* 2005; 57: 56–78
- 5 Rousseau DM. Assessing organizational Culture: the Case of multiple Methods. In: Schneider B, ed. Organizational Climate and Culture. San Francisco, CA: Jossey-Bass Pub.; 1990: 153–192
- 6 Poggie JJ. Toward quality control in key informant data. *Human Organization* 1972; 31: 23–30
- 7 Kumar N, Stern LW, Anderson JC. Conducting interorganizational research using key informants. *Acad Manage J* 1993; 36: 1633–1651
- 8 Jha A, Epstein A. Hospital governance and the quality of care. *Health Affairs* 2010; 29: 182–187
- 9 Lux MP, Fasching PA, Loehberg CR et al. Health services research and health economy – quality care training in gynaecology, with focus on gynaecological oncology. *Geburtsh Frauenheilk* 2011; 71: 1046–1055
- 10 Wöckel A, Varga D, Kurzeder C et al. Leitlinienkonformität bei der Therapie des Mammakarzinoms. *Geburtsh Frauenheilk* 2009; 69: 611–616
- 11 Lux MP, Hildebrandt T, Bani MR et al. Gesundheitsökonomische Aspekte und finanzielle Probleme in den zertifizierten Strukturen des Fachgebietes. *Gynäkologe* 2011; 44: 816–826
